# Supplementary material for: Mucosal expression of PI3, ANXA1, and VDR discriminates Crohn’s disease from ulcerative colitis
Source: PubMed Central journal article supplement (PMC10611705; doi:10.1038/s41598-023-45569-3), 2023-10-27
Supplement: 41598_2023_45569_MOESM1_ESM.pdf [file 41598_2023_45569_MOESM1_ESM.pdf]

## Supplementary file legends

**Supplementary file 1.** List of primers used for the custom Quantinova LNA RT-qPCR panel in the validation study.

Supplementary file 1 : The primers used in the custom panel RT-qPCR

| Assay/targets | Assay catalog number                                             |
|---------------|------------------------------------------------------------------|
| PPC           | HS_PPC_2467741 QuantiNova LNA PCR Reference Assay (SBH1218550)   |
| QIC           | HS_QIC_2467742 QuantiNova LNA PCR Reference Assay (SBH1218551)   |
| HGDC          | HS_HGDC_2467744 QuantiNova LNA PCR Reference Assay (SBH1218553)  |
| ACTB          | HS_ACTB_2475367 QuantiNova LNA PCR Reference Assay (SBH1220543)  |
| RPLP0         | HS_RPLP0_2476240 QuantiNova LNA PCR Reference Assay (SBH1220553) |
| PI3           | HS_PI3_1386086 QuantiNova LNA PCR Assay (SBH0142302)             |
| ANXA1         | HS_ANXA1_1342825 QuantiNova LNA PCR Assay (SBH0099041)           |
| VDR           | HS_VDR_1885746 QuantiNova LNA PCR Assay (SBH0641867)             |
| MTCL1         | HS_MTCL1_1263018 QuantiNova LNA PCR Assay (SBH0019234)           |
| SH3PXD2A-AS1  | HS_SH3PXD2A-AS1_1571027 QuantiNova LNA PCR Assay (SBH0327223)    |
| CLCF1         | HS_CLCF1_1669043 QuantiNova LNA PCR Assay (SBH0425229)           |
| CD180         | HS_CD180_2474682 QuantiNova LNA PCR Assay (SBH1219858)           |

**Supplementary file 2.** Results of testing 100 selected candidates from the discovery cohort in 3 data sets, GSE222070 (our own cohort), GSE117993, and GSE16879, using SAS. AUC - area under the receiver operating curve; CI - confidence interval. Given as a separate file (Supplementary file 2).

**Supplementary file 3.** Table of combined/individual AUC values at different ACTB Ct thresholds for three genes in discriminating CD from UC. P values for individual genes at different thresholds are shown in column 3.

Supplementary file 3 : Individual RT-qPCR AUCs and P values table

|                                               | ACTB Threshold | AUC for model    | P value<br>ANXA1/PI3/VDR |
|-----------------------------------------------|----------------|------------------|--------------------------|
| All 3 genes together.<br>Age and sex included | No threshold   | 0.61             | 0.42/0.91/0.13           |
|                                               | <32            | 0.65             | 0.18/0.91/0.19           |
|                                               | <31            | 0.69             | 0.16/0.79/0.08           |
|                                               | <30            | 0.73             | 0.15/0.66/0.08           |
|                                               | <29            | 0.84             | 0.12/0.34/0.02           |
|                                               | <28            | 0.92             | 0.04/0.45/0.04           |
|                                               | <27            | 0.96             | 0.07/0.53/0.04           |
| Univariate<br>(ANXA1/PI3/VDR)                 | No threshold   | 0.45 /0.50 /0.59 | 0.99/0.69/0.18           |
|                                               | <32            | 0.60 /0.53 /0.58 | 0.27/0.88/0.26           |
|                                               | <31            | 0.61 /0.55 /0.63 | 0.27/0.77/0.12           |
|                                               | <30            | 0.66 /0.50 /0.67 | 0.23/0.85/0.07           |
|                                               | <29            | 0.67 /0.53 /0.77 | 0.27/0.59/0.01           |
|                                               | <28            | 0.74 /0.53 /0.80 | 0.14/0.96/0.01           |
|                                               | <27            | 0.84 /0.58 /0.81 | 0.04/0.46/0.02           |

**Supplementary file 4.** Complete list of gene ontology results for the functional analysis is presented in supplementary file 4. Given as a separate file (Supplementary file 4).
