# Supplementary material for: Mucosal expression of PI3, ANXA1, and VDR discriminates Crohn’s disease from ulcerative colitis
Source: PubMed Central journal article supplement (PMC10611705; doi:10.1038/s41598-023-45569-3), 2023-10-27
Supplement: 41598_2023_45569_MOESM2_ESM.pdf [file 41598_2023_45569_MOESM2_ESM.pdf]

| Dataset    | Gene    | Probe set    | Odds Ratio | Lower 95% CI | Upper 95% CI | P-value | AUC  |
|------------|---------|--------------|------------|--------------|--------------|---------|------|
| 1:GSE22207 | ABCC1   |              | 0.12       | 0.02         | 0.69         | 0.0174  | 0.79 |
| 2:GSE11799 | ABCC1   |              | 0.65       | 0.37         | 1.13         | 0.1267  | 0.59 |
| 3:GSE16879 | ABCC1   | 202804_at    | 0.22       | 0.09         | 0.52         | 0.0006  | 0.69 |
| 3:GSE16879 | ABCC1   | 202805_s_at  | 0.31       | 0.16         | 0.60         | 0.0006  | 0.76 |
| 1:GSE22207 | ADAM33  |              | 0.31       | 0.12         | 0.77         | 0.0114  | 0.84 |
| 2:GSE11799 | ADAM33  |              | 1.27       | 0.85         | 1.91         | 0.2448  | 0.56 |
| 3:GSE16879 | ADAM33  | 232570_s_at  | 0.98       | 0.73         | 1.31         | 0.8853  | 0.51 |
| 3:GSE16879 | ADAM33  | 233868_x_at  | 0.99       | 0.69         | 1.41         | 0.9381  | 0.45 |
| 1:GSE22207 | ADAM9   |              | 0.10       | 0.02         | 0.57         | 0.0092  | 0.83 |
| 2:GSE11799 | ADAM9   |              | 0.51       | 0.29         | 0.90         | 0.0214  | 0.63 |
| 3:GSE16879 | ADAM9   | 1555326_a_at | 0.33       | 0.18         | 0.57         | 0.0001  | 0.73 |
| 3:GSE16879 | ADAM9   | 1570042_a_at | 1.13       | 0.79         | 1.60         | 0.5107  | 0.50 |
| 3:GSE16879 | ADAM9   | 202381_at    | 0.24       | 0.10         | 0.61         | 0.0026  | 0.69 |
| 1:GSE22207 | ANXA1   |              | 0.12       | 0.03         | 0.52         | 0.0046  | 0.85 |
| 2:GSE11799 | ANXA1   |              | 0.56       | 0.40         | 0.80         | 0.0012  | 0.68 |
| 3:GSE16879 | ANXA1   | 201012_at    | 0.59       | 0.46         | 0.75         | <.0001  | 0.76 |
| 1:GSE22207 | ANXA3   |              | 0.35       | 0.15         | 0.82         | 0.0160  | 0.76 |
| 2:GSE11799 | ANXA3   |              | 0.54       | 0.30         | 0.96         | 0.0351  | 0.62 |
| 3:GSE16879 | ANXA3   | 209369_at    | 0.31       | 0.16         | 0.60         | 0.0004  | 0.70 |
| 1:GSE22207 | ARRDC3  |              | 0.11       | 0.02         | 0.62         | 0.0122  | 0.83 |
| 2:GSE11799 | ARRDC3  |              | 0.77       | 0.43         | 1.35         | 0.3603  | 0.58 |
| 3:GSE16879 | ARRDC3  | 224797_at    | 0.21       | 0.10         | 0.41         | <.0001  | 0.76 |
| 1:GSE22207 | ATP8B2  |              | 0.16       | 0.04         | 0.63         | 0.0089  | 0.82 |
| 2:GSE11799 | ATP8B2  |              | 0.70       | 0.44         | 1.10         | 0.1234  | 0.60 |
| 3:GSE16879 | ATP8B2  | 216873_s_at  | 0.52       | 0.28         | 0.99         | 0.0475  | 0.60 |
| 3:GSE16879 | ATP8B2  | 226771_at    | 0.74       | 0.55         | 0.99         | 0.0411  | 0.61 |
| 1:GSE22207 | BHLHA15 |              | 0.25       | 0.09         | 0.66         | 0.0053  | 0.89 |
| 2:GSE11799 | BHLHA15 |              | 0.57       | 0.39         | 0.83         | 0.0037  | 0.69 |
| 3:GSE16879 | BHLHA15 | 235965_at    | 0.64       | 0.45         | 0.91         | 0.0130  | 0.67 |
| 1:GSE22207 | BHLHE41 |              | 0.30       | 0.11         | 0.81         | 0.0177  | 0.82 |
| 2:GSE11799 | BHLHE41 |              | 0.92       | 0.59         | 1.43         | 0.7022  | 0.52 |
| 3:GSE16879 | BHLHE41 | 221530_s_at  | 0.35       | 0.20         | 0.59         | <.0001  | 0.72 |
| 3:GSE16879 | BHLHE41 | 223185_s_at  | 0.51       | 0.35         | 0.73         | 0.0003  | 0.71 |
| 3:GSE16879 | BHLHE41 | 231242_at    | 0.96       | 0.72         | 1.27         | 0.7693  | 0.50 |
| 3:GSE16879 | BHLHE41 | 231243_s_at  | 0.56       | 0.36         | 0.88         | 0.0111  | 0.65 |
| 1:GSE22207 | BIN2    |              | 0.14       | 0.04         | 0.56         | 0.0050  | 0.80 |
| 2:GSE11799 | BIN2    |              | 0.58       | 0.30         | 1.13         | 0.1107  | 0.59 |
| 3:GSE16879 | BIN2    | 219191_s_at  | 0.76       | 0.58         | 0.98         | 0.0375  | 0.60 |
| 1:GSE22207 | BTG2    |              | 0.19       | 0.05         | 0.67         | 0.0095  | 0.82 |
| 2:GSE11799 | BTG2    |              | 0.74       | 0.43         | 1.27         | 0.2693  | 0.59 |

| Dataset    | Gene     | Probe set   | Odds Ratio | Lower 95% CI | Upper 95% CI | P-value | AUC  |
|------------|----------|-------------|------------|--------------|--------------|---------|------|
| 3:GSE16879 | BTG2     | 201235_s_at | 0.64       | 0.43         | 0.94         | 0.0224  | 0.62 |
| 3:GSE16879 | BTG2     | 201236_s_at | 0.40       | 0.22         | 0.72         | 0.0023  | 0.67 |
| 1:GSE22207 | C21orf33 |             | 8.29       | 1.75         | 39.28        | 0.0077  | 0.83 |
| 2:GSE11799 | C21orf33 |             | 0.71       | 0.52         | 0.98         | 0.0342  | 0.62 |
| 1:GSE22207 | CBX4     |             | 0.18       | 0.05         | 0.67         | 0.0105  | 0.81 |
| 2:GSE11799 | CBX4     |             | 0.45       | 0.20         | 1.02         | 0.0568  | 0.62 |
| 3:GSE16879 | CBX4     | 206724_at   | 0.54       | 0.35         | 0.84         | 0.0065  | 0.66 |
| 3:GSE16879 | CBX4     | 227558_at   | 0.36       | 0.18         | 0.71         | 0.0034  | 0.68 |
| 1:GSE22207 | CD180    |             | 0.31       | 0.13         | 0.74         | 0.0085  | 0.86 |
| 2:GSE11799 | CD180    |             | 0.37       | 0.23         | 0.60         | <.0001  | 0.72 |
| 3:GSE16879 | CD180    | 206206_at   | 0.75       | 0.59         | 0.95         | 0.0172  | 0.63 |
| 1:GSE22207 | CLCF1    |             | 0.35       | 0.15         | 0.79         | 0.0120  | 0.83 |
| 2:GSE11799 | CLCF1    |             | 0.60       | 0.36         | 0.99         | 0.0440  | 0.61 |
| 3:GSE16879 | CLCF1    | 219500_at   | 0.23       | 0.12         | 0.47         | <.0001  | 0.75 |
| 1:GSE22207 | CNKSR3   |             | 3.94       | 1.31         | 11.79        | 0.0143  | 0.76 |
| 2:GSE11799 | CNKSR3   |             | 2.76       | 1.46         | 5.20         | 0.0017  | 0.69 |
| 3:GSE16879 | CNKSR3   | 1569331_at  | 1.01       | 0.81         | 1.27         | 0.9044  | 0.50 |
| 3:GSE16879 | CNKSR3   | 227481_at   | 3.46       | 1.78         | 6.73         | 0.0003  | 0.73 |
| 3:GSE16879 | CNKSR3   | 237302_at   | 1.25       | 0.96         | 1.63         | 0.0939  | 0.61 |
| 3:GSE16879 | CNKSR3   | 242394_at   | 1.20       | 0.85         | 1.67         | 0.2997  | 0.58 |
| 1:GSE22207 | COL3A1   |             | 0.27       | 0.09         | 0.78         | 0.0158  | 0.81 |
| 2:GSE11799 | COL3A1   |             | 0.65       | 0.42         | 1.01         | 0.0577  | 0.63 |
| 3:GSE16879 | COL3A1   | 201852_x_at | 0.76       | 0.60         | 0.97         | 0.0246  | 0.63 |
| 3:GSE16879 | COL3A1   | 211161_s_at | 0.71       | 0.53         | 0.94         | 0.0161  | 0.64 |
| 3:GSE16879 | COL3A1   | 215076_s_at | 0.74       | 0.56         | 0.97         | 0.0269  | 0.62 |
| 1:GSE22207 | CPEB4    |             | 0.04       | 0.00         | 0.46         | 0.0091  | 0.82 |
| 2:GSE11799 | CPEB4    |             | 0.80       | 0.53         | 1.21         | 0.2966  | 0.58 |
| 3:GSE16879 | CPEB4    | 224828_at   | 0.67       | 0.31         | 1.44         | 0.3067  | 0.55 |
| 3:GSE16879 | CPEB4    | 224829_at   | 0.54       | 0.25         | 1.14         | 0.1060  | 0.57 |
| 3:GSE16879 | CPEB4    | 224831_at   | 0.42       | 0.21         | 0.83         | 0.0123  | 0.63 |
| 1:GSE22207 | CR1      |             | 0.35       | 0.15         | 0.83         | 0.0163  | 0.81 |
| 2:GSE11799 | CR1      |             | 0.76       | 0.59         | 0.99         | 0.0433  | 0.61 |
| 3:GSE16879 | CR1      | 206244_at   | 0.87       | 0.69         | 1.09         | 0.2302  | 0.59 |
| 3:GSE16879 | CR1      | 208488_s_at | 0.87       | 0.66         | 1.15         | 0.3249  | 0.55 |
| 3:GSE16879 | CR1      | 217484_at   | 0.86       | 0.49         | 1.53         | 0.6107  | 0.54 |
| 3:GSE16879 | CR1      | 217552_x_at | 0.88       | 0.71         | 1.10         | 0.2621  | 0.59 |
| 3:GSE16879 | CR1      | 239205_s_at | 0.93       | 0.72         | 1.20         | 0.5768  | 0.53 |
| 3:GSE16879 | CR1      | 244313_at   | 0.76       | 0.57         | 1.02         | 0.0703  | 0.59 |
| 1:GSE22207 | CYTH4    |             | 0.28       | 0.10         | 0.74         | 0.0101  | 0.83 |
| 2:GSE11799 | CYTH4    |             | 0.55       | 0.33         | 0.91         | 0.0212  | 0.63 |

| Dataset    | Gene    | Probe set    | Odds Ratio | Lower 95% CI | Upper 95% CI | P-value | AUC  |
|------------|---------|--------------|------------|--------------|--------------|---------|------|
| 3:GSE16879 | CYTH4   | 1554335_at   | 0.87       | 0.68         | 1.12         | 0.2743  | 0.57 |
| 3:GSE16879 | CYTH4   | 211521_s_at  | 0.99       | 0.65         | 1.51         | 0.9699  | 0.47 |
| 3:GSE16879 | CYTH4   | 219183_s_at  | 0.81       | 0.51         | 1.31         | 0.3981  | 0.55 |
| 1:GSE22207 | DECR2   |              | 4.27       | 1.30         | 14.09        | 0.0170  | 0.80 |
| 2:GSE11799 | DECR2   |              | 3.65       | 1.62         | 8.26         | 0.0018  | 0.69 |
| 3:GSE16879 | DECR2   | 219664_s_at  | 11.86      | 4.28         | 32.82        | <.0001  | 0.81 |
| 1:GSE22207 | DNM1    |              | 0.31       | 0.12         | 0.80         | 0.0160  | 0.81 |
| 2:GSE11799 | DNM1    |              | 0.83       | 0.52         | 1.31         | 0.4283  | 0.54 |
| 3:GSE16879 | DNM1    | 215116_s_at  | 0.87       | 0.67         | 1.14         | 0.3264  | 0.55 |
| 1:GSE22207 | DTX3    |              | 0.25       | 0.08         | 0.75         | 0.0130  | 0.76 |
| 2:GSE11799 | DTX3    |              | 0.98       | 0.51         | 1.88         | 0.9529  | 0.50 |
| 3:GSE16879 | DTX3    | 221835_at    | 0.95       | 0.67         | 1.33         | 0.7552  | 0.52 |
| 3:GSE16879 | DTX3    | 235721_at    | 0.64       | 0.45         | 0.90         | 0.0109  | 0.64 |
| 3:GSE16879 | DTX3    | 49049_at     | 0.73       | 0.52         | 1.03         | 0.0699  | 0.60 |
| 3:GSE16879 | DTX3    | 49051_g_at   | 1.08       | 0.83         | 1.41         | 0.5830  | 0.53 |
| 1:GSE22207 | EDEM1   |              | 0.12       | 0.02         | 0.59         | 0.0099  | 0.81 |
| 2:GSE11799 | EDEM1   |              | 0.62       | 0.33         | 1.16         | 0.1369  | 0.60 |
| 3:GSE16879 | EDEM1   | 203279_at    | 0.11       | 0.03         | 0.36         | 0.0003  | 0.74 |
| 1:GSE22207 | ELL2    |              | 0.14       | 0.03         | 0.71         | 0.0173  | 0.77 |
| 2:GSE11799 | ELL2    |              | 0.53       | 0.33         | 0.86         | 0.0104  | 0.64 |
| 3:GSE16879 | ELL2    | 214446_at    | 0.53       | 0.35         | 0.81         | 0.0033  | 0.72 |
| 3:GSE16879 | ELL2    | 226099_at    | 0.41       | 0.23         | 0.71         | 0.0014  | 0.67 |
| 3:GSE16879 | ELL2    | 226982_at    | 0.52       | 0.26         | 1.03         | 0.0605  | 0.60 |
| 3:GSE16879 | ELL2    | 240038_at    | 0.59       | 0.33         | 1.04         | 0.0677  | 0.60 |
| 1:GSE22207 | EMD     |              | 0.31       | 0.12         | 0.80         | 0.0161  | 0.79 |
| 2:GSE11799 | EMD     |              | 0.27       | 0.05         | 1.54         | 0.1393  | 0.57 |
| 3:GSE16879 | EMD     | 209477_at    | 0.43       | 0.19         | 0.99         | 0.0469  | 0.60 |
| 2:GSE11799 | ERO1A   |              | 0.45       | 0.30         | 0.66         | <.0001  | 0.74 |
| 3:GSE16879 | ERO1A   | 218498_s_at  | 0.40       | 0.27         | 0.59         | <.0001  | 0.75 |
| 3:GSE16879 | ERO1A   | 222646_s_at  | 0.49       | 0.35         | 0.69         | <.0001  | 0.73 |
| 3:GSE16879 | ERO1A   | 225750_at    | 0.24       | 0.13         | 0.42         | <.0001  | 0.77 |
| 1:GSE22207 | ERO1L   |              | 0.18       | 0.05         | 0.67         | 0.0104  | 0.81 |
| 1:GSE22207 | FAM100B |              | 12.17      | 1.64         | 90.14        | 0.0144  | 0.81 |
| 1:GSE22207 | FAM227B |              | 0.34       | 0.15         | 0.77         | 0.0094  | 0.86 |
| 2:GSE11799 | FAM227B |              | 1.04       | 0.52         | 2.10         | 0.9079  | 0.53 |
| 3:GSE16879 | FAM227B | 1553799_at   | 1.10       | 0.89         | 1.37         | 0.3820  | 0.54 |
| 3:GSE16879 | FAM227B | 1557429_s_at | 1.19       | 0.92         | 1.55         | 0.1926  | 0.56 |
| 1:GSE22207 | FAM46C  |              | 0.04       | 0.00         | 0.41         | 0.0069  | 0.89 |
| 2:GSE11799 | FAM46C  |              | 0.37       | 0.19         | 0.73         | 0.0044  | 0.66 |
| 1:GSE22207 | FCRL5   |              | 0.20       | 0.06         | 0.67         | 0.0095  | 0.87 |

| Dataset    | Gene    | Probe set    | Odds Ratio | Lower 95% CI | Upper 95% CI | P-value | AUC  |
|------------|---------|--------------|------------|--------------|--------------|---------|------|
| 2:GSE11799 | FCRL5   |              | 0.46       | 0.31         | 0.68         | 0.0001  | 0.71 |
| 3:GSE16879 | FCRL5   | 1555799_at   | 0.85       | 0.67         | 1.09         | 0.1930  | 0.57 |
| 3:GSE16879 | FCRL5   | 224404_s_at  | 0.79       | 0.65         | 0.97         | 0.0272  | 0.66 |
| 3:GSE16879 | FCRL5   | 224405_at    | 0.74       | 0.59         | 0.95         | 0.0163  | 0.69 |
| 3:GSE16879 | FCRL5   | 224406_s_at  | 0.73       | 0.59         | 0.92         | 0.0079  | 0.66 |
| 3:GSE16879 | FCRL5   | 231647_s_at  | 0.71       | 0.57         | 0.88         | 0.0018  | 0.69 |
| 1:GSE22207 | FGF7    |              | 0.31       | 0.13         | 0.73         | 0.0073  | 0.81 |
| 2:GSE11799 | FGF7    |              | 0.92       | 0.69         | 1.23         | 0.5792  | 0.55 |
| 3:GSE16879 | FGF7    | 1554741_s_at | 0.77       | 0.57         | 1.03         | 0.0808  | 0.62 |
| 3:GSE16879 | FGF7    | 1555102_at   | 1.04       | 0.84         | 1.28         | 0.7450  | 0.51 |
| 3:GSE16879 | FGF7    | 1555103_s_at | 0.97       | 0.78         | 1.20         | 0.7674  | 0.49 |
| 3:GSE16879 | FGF7    | 205782_at    | 0.98       | 0.68         | 1.39         | 0.8910  | 0.52 |
| 2:GSE11799 | GCN1    |              | 1.55       | 0.76         | 3.16         | 0.2232  | 0.59 |
| 3:GSE16879 | GCN1    | 212139_at    | 0.12       | 0.03         | 0.53         | 0.0050  | 0.67 |
| 3:GSE16879 | GCN1    | 216232_s_at  | 0.07       | 0.01         | 0.37         | 0.0018  | 0.66 |
| 1:GSE22207 | GCN1L1  |              | 0.13       | 0.02         | 0.69         | 0.0173  | 0.78 |
| 1:GSE22207 | GNA15   |              | 0.33       | 0.13         | 0.83         | 0.0184  | 0.79 |
| 2:GSE11799 | GNA15   |              | 0.38       | 0.23         | 0.62         | 0.0001  | 0.74 |
| 3:GSE16879 | GNA15   | 205349_at    | 0.49       | 0.33         | 0.73         | 0.0004  | 0.72 |
| 1:GSE22207 | GPR63   |              | 0.32       | 0.13         | 0.80         | 0.0150  | 0.80 |
| 2:GSE11799 | GPR63   |              | 1.39       | 0.89         | 2.17         | 0.1461  | 0.58 |
| 3:GSE16879 | GPR63   | 220993_s_at  | 0.98       | 0.72         | 1.32         | 0.8823  | 0.51 |
| 1:GSE22207 | GPRC5A  |              | 0.34       | 0.15         | 0.79         | 0.0112  | 0.85 |
| 2:GSE11799 | GPRC5A  |              | 0.82       | 0.53         | 1.25         | 0.3508  | 0.56 |
| 3:GSE16879 | GPRC5A  | 203108_at    | 0.25       | 0.14         | 0.46         | <.0001  | 0.77 |
| 3:GSE16879 | GPRC5A  | 212444_at    | 0.15       | 0.07         | 0.32         | <.0001  | 0.82 |
| 3:GSE16879 | GPRC5A  | 235563_at    | 0.52       | 0.38         | 0.73         | 0.0001  | 0.74 |
| 1:GSE22207 | HERPUD1 |              | 0.06       | 0.01         | 0.49         | 0.0087  | 0.82 |
| 2:GSE11799 | HERPUD1 |              | 0.37       | 0.16         | 0.85         | 0.0192  | 0.64 |
| 3:GSE16879 | HERPUD1 | 1569380_a_at | 0.96       | 0.73         | 1.27         | 0.7740  | 0.51 |
| 3:GSE16879 | HERPUD1 | 217168_s_at  | 0.23       | 0.09         | 0.59         | 0.0021  | 0.68 |
| 1:GSE22207 | HGF     |              | 0.20       | 0.06         | 0.66         | 0.0088  | 0.89 |
| 2:GSE11799 | HGF     |              | 0.75       | 0.55         | 1.03         | 0.0745  | 0.60 |
| 3:GSE16879 | HGF     | 209960_at    | 0.74       | 0.57         | 0.96         | 0.0243  | 0.63 |
| 3:GSE16879 | HGF     | 209961_s_at  | 0.78       | 0.55         | 1.11         | 0.1738  | 0.62 |
| 3:GSE16879 | HGF     | 210755_at    | 0.89       | 0.67         | 1.17         | 0.3900  | 0.56 |
| 3:GSE16879 | HGF     | 210997_at    | 0.86       | 0.72         | 1.04         | 0.1152  | 0.60 |
| 3:GSE16879 | HGF     | 210998_s_at  | 0.92       | 0.73         | 1.15         | 0.4394  | 0.55 |
| 1:GSE22207 | HMGB2   |              | 6.78       | 1.42         | 32.25        | 0.0162  | 0.79 |
| 2:GSE11799 | HMGB2   |              | 1.20       | 0.53         | 2.73         | 0.6616  | 0.52 |

| Dataset    | Gene     | Probe set   | Odds Ratio | Lower 95% CI | Upper 95% CI | P-value | AUC  |
|------------|----------|-------------|------------|--------------|--------------|---------|------|
| 3:GSE16879 | HMGB2    | 208808_s_at | 0.36       | 0.16         | 0.85         | 0.0187  | 0.64 |
| 1:GSE22207 | IGLL3P   |             | 0.19       | 0.06         | 0.59         | 0.0042  | 0.85 |
| 2:GSE11799 | IGLL3P   |             | 0.68       | 0.54         | 0.87         | 0.0020  | 0.73 |
| 3:GSE16879 | IGLL3P   | 215946_x_at | 0.69       | 0.55         | 0.87         | 0.0017  | 0.67 |
| 1:GSE22207 | IL6R     |             | 0.16       | 0.04         | 0.65         | 0.0103  | 0.82 |
| 2:GSE11799 | IL6R     |             | 2.30       | 1.20         | 4.40         | 0.0119  | 0.62 |
| 3:GSE16879 | IL6R     | 205945_at   | 3.46       | 1.51         | 7.93         | 0.0034  | 0.65 |
| 3:GSE16879 | IL6R     | 217489_s_at | 1.20       | 0.86         | 1.68         | 0.2855  | 0.56 |
| 3:GSE16879 | IL6R     | 226333_at   | 3.74       | 1.50         | 9.29         | 0.0046  | 0.68 |
| 1:GSE22207 | IRF4     |             | 0.26       | 0.10         | 0.68         | 0.0061  | 0.85 |
| 2:GSE11799 | IRF4     |             | 0.51       | 0.33         | 0.79         | 0.0024  | 0.67 |
| 3:GSE16879 | IRF4     | 204562_at   | 0.57       | 0.40         | 0.81         | 0.0019  | 0.69 |
| 3:GSE16879 | IRF4     | 216986_s_at | 0.97       | 0.71         | 1.31         | 0.8246  | 0.51 |
| 3:GSE16879 | IRF4     | 216987_at   | 0.80       | 0.61         | 1.06         | 0.1195  | 0.59 |
| 1:GSE22207 | ITGA6    |             | 0.10       | 0.02         | 0.65         | 0.0156  | 0.81 |
| 2:GSE11799 | ITGA6    |             | 0.70       | 0.38         | 1.27         | 0.2404  | 0.57 |
| 3:GSE16879 | ITGA6    | 201656_at   | 0.49       | 0.19         | 1.29         | 0.1485  | 0.57 |
| 3:GSE16879 | ITGA6    | 215177_s_at | 0.33       | 0.18         | 0.61         | 0.0005  | 0.69 |
| 1:GSE22207 | ITPKB    |             | 0.27       | 0.10         | 0.75         | 0.0115  | 0.78 |
| 2:GSE11799 | ITPKB    |             | 0.81       | 0.44         | 1.49         | 0.4908  | 0.52 |
| 3:GSE16879 | ITPKB    | 1554306_at  | 1.11       | 0.84         | 1.46         | 0.4643  | 0.54 |
| 3:GSE16879 | ITPKB    | 203723_at   | 1.01       | 0.69         | 1.49         | 0.9540  | 0.50 |
| 1:GSE22207 | KIAA0040 |             | 0.09       | 0.01         | 0.62         | 0.0139  | 0.82 |
| 2:GSE11799 | KIAA0040 |             | 0.73       | 0.40         | 1.30         | 0.2848  | 0.58 |
| 3:GSE16879 | KIAA0040 | 203143_s_at | 0.18       | 0.07         | 0.42         | <.0001  | 0.74 |
| 3:GSE16879 | KIAA0040 | 203144_s_at | 0.44       | 0.25         | 0.78         | 0.0046  | 0.69 |
| 1:GSE22207 | KLF2     |             | 0.24       | 0.08         | 0.72         | 0.0115  | 0.81 |
| 2:GSE11799 | KLF2     |             | 0.78       | 0.50         | 1.24         | 0.2959  | 0.55 |
| 3:GSE16879 | KLF2     | 219371_s_at | 0.28       | 0.16         | 0.48         | <.0001  | 0.77 |
| 3:GSE16879 | KLF2     | 226646_at   | 0.84       | 0.59         | 1.18         | 0.3049  | 0.55 |
| 1:GSE22207 | KLHL5    |             | 0.23       | 0.07         | 0.78         | 0.0185  | 0.81 |
| 2:GSE11799 | KLHL5    |             | 0.59       | 0.39         | 0.91         | 0.0164  | 0.64 |
| 3:GSE16879 | KLHL5    | 226001_at   | 0.88       | 0.66         | 1.18         | 0.3957  | 0.54 |
| 3:GSE16879 | KLHL5    | 227565_at   | 1.12       | 0.72         | 1.73         | 0.6168  | 0.53 |
| 3:GSE16879 | KLHL5    | 232297_at   | 1.00       | 0.68         | 1.47         | 0.9971  | 0.51 |
| 3:GSE16879 | KLHL5    | 233866_at   | 0.83       | 0.64         | 1.09         | 0.1800  | 0.58 |
| 1:GSE22207 | LAMC1    |             | 0.18       | 0.04         | 0.75         | 0.0181  | 0.82 |
| 2:GSE11799 | LAMC1    |             | 0.83       | 0.53         | 1.29         | 0.4088  | 0.57 |
| 3:GSE16879 | LAMC1    | 200770_s_at | 0.48       | 0.30         | 0.77         | 0.0021  | 0.69 |
| 3:GSE16879 | LAMC1    | 200771_at   | 0.58       | 0.36         | 0.94         | 0.0261  | 0.66 |

| Dataset    | Gene      | Probe set    | Odds Ratio | Lower 95% CI | Upper 95% CI | P-value | AUC  |
|------------|-----------|--------------|------------|--------------|--------------|---------|------|
| 1:GSE22207 | LEPR      |              | 0.31       | 0.12         | 0.80         | 0.0150  | 0.88 |
| 2:GSE11799 | LEPR      |              | 1.07       | 0.67         | 1.71         | 0.7801  | 0.52 |
| 3:GSE16879 | LEPR      | 1556997_a_at | 0.95       | 0.75         | 1.19         | 0.6419  | 0.51 |
| 3:GSE16879 | LEPR      | 207255_at    | 0.89       | 0.64         | 1.25         | 0.5142  | 0.49 |
| 3:GSE16879 | LEPR      | 209894_at    | 0.79       | 0.47         | 1.34         | 0.3859  | 0.56 |
| 3:GSE16879 | LEPR      | 211354_s_at  | 0.83       | 0.61         | 1.11         | 0.2106  | 0.56 |
| 3:GSE16879 | LEPR      | 211355_x_at  | 0.89       | 0.59         | 1.33         | 0.5582  | 0.53 |
| 3:GSE16879 | LEPR      | 211356_x_at  | 0.76       | 0.45         | 1.28         | 0.2975  | 0.53 |
| 1:GSE22207 | LINC00167 |              | 3.09       | 1.33         | 7.17         | 0.0088  | 0.79 |
| 2:GSE11799 | LINC00167 |              | 1.12       | 0.90         | 1.38         | 0.3068  | 0.57 |
| 3:GSE16879 | LINC00167 | 1562413_at   | 0.85       | 0.65         | 1.11         | 0.2257  | 0.57 |
| 1:GSE22207 | LOC392196 |              | 2.78       | 1.31         | 5.92         | 0.0080  | 0.82 |
| 1:GSE22207 | ME1       |              | 0.15       | 0.04         | 0.64         | 0.0105  | 0.86 |
| 2:GSE11799 | ME1       |              | 0.49       | 0.30         | 0.79         | 0.0038  | 0.66 |
| 3:GSE16879 | ME1       | 204058_at    | 0.43       | 0.27         | 0.68         | 0.0003  | 0.73 |
| 3:GSE16879 | ME1       | 204059_s_at  | 0.38       | 0.22         | 0.64         | 0.0003  | 0.73 |
| 1:GSE22207 | MRVI1     |              | 0.17       | 0.05         | 0.67         | 0.0111  | 0.82 |
| 2:GSE11799 | MRVI1     |              | 0.87       | 0.51         | 1.47         | 0.5989  | 0.53 |
| 1:GSE22207 | MT1E      |              | 3.05       | 1.27         | 7.34         | 0.0128  | 0.79 |
| 2:GSE11799 | MT1E      |              | 1.69       | 1.16         | 2.48         | 0.0064  | 0.65 |
| 3:GSE16879 | MT1E      | 212859_x_at  | 1.28       | 0.86         | 1.91         | 0.2310  | 0.59 |
| 2:GSE11799 | MTCL1     |              | 0.60       | 0.39         | 0.91         | 0.0167  | 0.63 |
| 3:GSE16879 | MTCL1     | 213358_at    | 0.33       | 0.20         | 0.54         | <.0001  | 0.76 |
| 1:GSE22207 | MTMR10    |              | 21.91      | 2.41         | 199.11       | 0.0061  | 0.88 |
| 2:GSE11799 | MTMR10    |              | 2.61       | 1.18         | 5.80         | 0.0184  | 0.62 |
| 3:GSE16879 | MTMR10    | 220286_at    | 0.79       | 0.55         | 1.13         | 0.1915  | 0.57 |
| 3:GSE16879 | MTMR10    | 225810_at    | 2.12       | 0.57         | 7.80         | 0.2602  | 0.57 |
| 1:GSE22207 | MYEOV     |              | 0.36       | 0.16         | 0.79         | 0.0111  | 0.82 |
| 2:GSE11799 | MYEOV     |              | 0.61       | 0.44         | 0.84         | 0.0025  | 0.67 |
| 3:GSE16879 | MYEOV     | 227342_s_at  | 0.36       | 0.19         | 0.68         | 0.0015  | 0.67 |
| 1:GSE22207 | MZB1      |              | 0.28       | 0.11         | 0.73         | 0.0090  | 0.80 |
| 2:GSE11799 | MZB1      |              | 0.38       | 0.25         | 0.59         | <.0001  | 0.74 |
| 3:GSE16879 | MZB1      | 221286_s_at  | 0.69       | 0.56         | 0.85         | 0.0006  | 0.71 |
| 3:GSE16879 | MZB1      | 223565_at    | 0.73       | 0.59         | 0.89         | 0.0026  | 0.68 |
| 1:GSE22207 | NLRX1     |              | 0.13       | 0.03         | 0.67         | 0.0149  | 0.81 |
| 2:GSE11799 | NLRX1     |              | 1.76       | 0.63         | 4.91         | 0.2773  | 0.57 |
| 3:GSE16879 | NLRX1     | 1553695_a_at | 0.72       | 0.53         | 0.97         | 0.0328  | 0.64 |
| 3:GSE16879 | NLRX1     | 219680_at    | 0.61       | 0.30         | 1.23         | 0.1661  | 0.58 |
| 1:GSE22207 | PDK1      |              | 0.24       | 0.08         | 0.73         | 0.0122  | 0.87 |
| 2:GSE11799 | PDK1      |              | 0.40       | 0.23         | 0.70         | 0.0015  | 0.68 |

| Dataset    | Gene    | Probe set    | Odds Ratio | Lower 95% CI | Upper 95% CI | P-value | AUC  |
|------------|---------|--------------|------------|--------------|--------------|---------|------|
| 3:GSE16879 | PDK1    | 206686_at    | 0.46       | 0.31         | 0.67         | <.0001  | 0.75 |
| 3:GSE16879 | PDK1    | 226452_at    | 0.19       | 0.09         | 0.38         | <.0001  | 0.79 |
| 3:GSE16879 | PDK1    | 239798_at    | 0.63       | 0.41         | 0.97         | 0.0340  | 0.61 |
| 1:GSE22207 | PHF21A  |              | 0.27       | 0.09         | 0.79         | 0.0172  | 0.77 |
| 2:GSE11799 | PHF21A  |              | 0.74       | 0.42         | 1.33         | 0.3162  | 0.54 |
| 3:GSE16879 | PHF21A  | 1554153_a_at | 0.77       | 0.47         | 1.26         | 0.2957  | 0.53 |
| 3:GSE16879 | PHF21A  | 203278_s_at  | 0.49       | 0.25         | 0.96         | 0.0374  | 0.60 |
| 3:GSE16879 | PHF21A  | 227090_at    | 1.22       | 0.71         | 2.09         | 0.4770  | 0.49 |
| 1:GSE22207 | PI3     |              | 0.21       | 0.07         | 0.61         | 0.0039  | 0.90 |
| 2:GSE11799 | PI3     |              | 0.42       | 0.30         | 0.59         | <.0001  | 0.83 |
| 3:GSE16879 | PI3     | 203691_at    | 0.56       | 0.44         | 0.72         | <.0001  | 0.79 |
| 3:GSE16879 | PI3     | 41469_at     | 0.52       | 0.39         | 0.69         | <.0001  | 0.79 |
| 1:GSE22207 | PITPNC1 |              | 0.05       | 0.01         | 0.37         | 0.0041  | 0.88 |
| 2:GSE11799 | PITPNC1 |              | 0.16       | 0.07         | 0.35         | <.0001  | 0.78 |
| 3:GSE16879 | PITPNC1 | 1568949_at   | 0.51       | 0.33         | 0.80         | 0.0032  | 0.70 |
| 3:GSE16879 | PITPNC1 | 219155_at    | 0.25       | 0.14         | 0.44         | <.0001  | 0.79 |
| 3:GSE16879 | PITPNC1 | 229414_at    | 0.43       | 0.26         | 0.70         | 0.0007  | 0.71 |
| 3:GSE16879 | PITPNC1 | 238649_at    | 0.28       | 0.15         | 0.53         | <.0001  | 0.74 |
| 1:GSE22207 | PLEKHG2 |              | 0.30       | 0.11         | 0.82         | 0.0185  | 0.77 |
| 2:GSE11799 | PLEKHG2 |              | 0.62       | 0.39         | 0.98         | 0.0407  | 0.62 |
| 3:GSE16879 | PLEKHG2 | 1558407_at   | 1.67       | 0.99         | 2.82         | 0.0558  | 0.61 |
| 3:GSE16879 | PLEKHG2 | 225979_at    | 0.85       | 0.67         | 1.07         | 0.1639  | 0.57 |
| 3:GSE16879 | PLEKHG2 | 233986_s_at  | 0.84       | 0.68         | 1.04         | 0.1067  | 0.59 |
| 1:GSE22207 | PPARD   |              | 0.10       | 0.02         | 0.59         | 0.0111  | 0.82 |
| 2:GSE11799 | PPARD   |              | 1.25       | 0.63         | 2.46         | 0.5223  | 0.55 |
| 3:GSE16879 | PPARD   | 208044_s_at  | 0.43       | 0.22         | 0.84         | 0.0142  | 0.63 |
| 3:GSE16879 | PPARD   | 210636_at    | 0.95       | 0.74         | 1.23         | 0.7001  | 0.52 |
| 3:GSE16879 | PPARD   | 37152_at     | 0.22       | 0.10         | 0.48         | 0.0001  | 0.73 |
| 1:GSE22207 | PRDM15  |              | 0.26       | 0.09         | 0.75         | 0.0133  | 0.86 |
| 2:GSE11799 | PRDM15  |              | 0.60       | 0.36         | 1.01         | 0.0547  | 0.61 |
| 3:GSE16879 | PRDM15  | 230777_s_at  | 0.58       | 0.28         | 1.18         | 0.1298  | 0.62 |
| 3:GSE16879 | PRDM15  | 231931_at    | 0.81       | 0.60         | 1.10         | 0.1754  | 0.59 |
| 3:GSE16879 | PRDM15  | 234524_at    | 0.98       | 0.67         | 1.43         | 0.9186  | 0.55 |
| 3:GSE16879 | PRDM15  | 236061_at    | 1.09       | 0.80         | 1.47         | 0.5918  | 0.55 |
| 1:GSE22207 | PRSS22  |              | 0.37       | 0.17         | 0.77         | 0.0076  | 0.82 |
| 2:GSE11799 | PRSS22  |              | 0.63       | 0.42         | 0.96         | 0.0293  | 0.63 |
| 3:GSE16879 | PRSS22  | 205847_at    | 0.29       | 0.15         | 0.56         | 0.0002  | 0.70 |
| 1:GSE22207 | RBM12   |              | 0.18       | 0.05         | 0.69         | 0.0126  | 0.81 |
| 2:GSE11799 | RBM12   |              | 1.19       | 0.68         | 2.08         | 0.5413  | 0.54 |
| 3:GSE16879 | RBM12   | 212168_at    | 0.02       | 0.00         | 0.17         | 0.0003  | 0.70 |

| Dataset    | Gene    | Probe set    | Odds Ratio | Lower 95% CI | Upper 95% CI | P-value | AUC  |
|------------|---------|--------------|------------|--------------|--------------|---------|------|
| 3:GSE16879 | RBM12   | 212170_at    | 0.33       | 0.14         | 0.79         | 0.0124  | 0.65 |
| 1:GSE22207 | RBPMS   |              | 0.10       | 0.02         | 0.50         | 0.0048  | 0.85 |
| 2:GSE11799 | RBPMS   |              | 0.20       | 0.10         | 0.41         | <.0001  | 0.76 |
| 3:GSE16879 | RBPMS   | 1557223_at   | 0.80       | 0.53         | 1.20         | 0.2871  | 0.55 |
| 3:GSE16879 | RBPMS   | 207836_s_at  | 0.46       | 0.32         | 0.67         | <.0001  | 0.76 |
| 3:GSE16879 | RBPMS   | 207837_at    | 0.81       | 0.64         | 1.03         | 0.0846  | 0.59 |
| 3:GSE16879 | RBPMS   | 209487_at    | 0.39       | 0.25         | 0.59         | <.0001  | 0.76 |
| 3:GSE16879 | RBPMS   | 209488_s_at  | 0.42       | 0.29         | 0.63         | <.0001  | 0.76 |
| 3:GSE16879 | RBPMS   | 231961_at    | 0.92       | 0.69         | 1.24         | 0.5915  | 0.56 |
| 1:GSE22207 | RDX     |              | 0.14       | 0.03         | 0.66         | 0.0123  | 0.82 |
| 2:GSE11799 | RDX     |              | 1.17       | 0.69         | 1.98         | 0.5707  | 0.51 |
| 3:GSE16879 | RDX     | 204969_s_at  | 0.59       | 0.38         | 0.92         | 0.0186  | 0.64 |
| 3:GSE16879 | RDX     | 212397_at    | 0.62       | 0.43         | 0.89         | 0.0100  | 0.65 |
| 3:GSE16879 | RDX     | 212398_at    | 0.59       | 0.36         | 0.96         | 0.0331  | 0.61 |
| 3:GSE16879 | RDX     | 244739_at    | 0.90       | 0.68         | 1.20         | 0.4821  | 0.54 |
| 1:GSE22207 | RHOJ    |              | 0.16       | 0.04         | 0.72         | 0.0172  | 0.85 |
| 2:GSE11799 | RHOJ    |              | 0.65       | 0.37         | 1.14         | 0.1325  | 0.60 |
| 3:GSE16879 | RHOJ    | 1555233_at   | 0.99       | 0.80         | 1.23         | 0.9433  | 0.51 |
| 3:GSE16879 | RHOJ    | 1555234_a_at | 0.86       | 0.65         | 1.15         | 0.3135  | 0.55 |
| 3:GSE16879 | RHOJ    | 235131_at    | 1.20       | 0.64         | 2.24         | 0.5758  | 0.55 |
| 3:GSE16879 | RHOJ    | 235489_at    | 0.76       | 0.55         | 1.06         | 0.1034  | 0.64 |
| 3:GSE16879 | RHOJ    | 238905_at    | 0.61       | 0.37         | 1.00         | 0.0487  | 0.60 |
| 3:GSE16879 | RHOJ    | 238906_s_at  | 0.91       | 0.70         | 1.19         | 0.5053  | 0.55 |
| 3:GSE16879 | RHOJ    | 243481_at    | 0.94       | 0.68         | 1.30         | 0.6911  | 0.51 |
| 1:GSE22207 | RPN2    |              | 0.11       | 0.02         | 0.62         | 0.0123  | 0.78 |
| 2:GSE11799 | RPN2    |              | 0.21       | 0.06         | 0.67         | 0.0082  | 0.65 |
| 3:GSE16879 | RPN2    | 208689_s_at  | 0.12       | 0.03         | 0.42         | 0.0011  | 0.69 |
| 3:GSE16879 | RPN2    | 213399_x_at  | 0.28       | 0.08         | 0.91         | 0.0340  | 0.63 |
| 3:GSE16879 | RPN2    | 213491_x_at  | 0.27       | 0.09         | 0.82         | 0.0205  | 0.65 |
| 1:GSE22207 | SDSL    |              | 3.62       | 1.34         | 9.79         | 0.0111  | 0.81 |
| 2:GSE11799 | SDSL    |              | 4.17       | 1.65         | 10.55        | 0.0025  | 0.69 |
| 3:GSE16879 | SDSL    | 228274_at    | 1.95       | 1.26         | 3.01         | 0.0027  | 0.69 |
| 1:GSE22207 | SEC14L1 |              | 0.11       | 0.02         | 0.69         | 0.0185  | 0.79 |
| 2:GSE11799 | SEC14L1 |              | 0.51       | 0.26         | 0.98         | 0.0441  | 0.61 |
| 3:GSE16879 | SEC14L1 | 202082_s_at  | 0.44       | 0.24         | 0.80         | 0.0071  | 0.65 |
| 3:GSE16879 | SEC14L1 | 202083_s_at  | 0.47       | 0.29         | 0.77         | 0.0029  | 0.67 |
| 3:GSE16879 | SEC14L1 | 202084_s_at  | 0.27       | 0.12         | 0.58         | 0.0008  | 0.69 |
| 1:GSE22207 | SEL1L3  |              | 0.06       | 0.01         | 0.55         | 0.0129  | 0.79 |
| 2:GSE11799 | SEL1L3  |              | 0.10       | 0.03         | 0.39         | 0.0009  | 0.68 |
| 3:GSE16879 | SEL1L3  | 212311_at    | 0.18       | 0.05         | 0.61         | 0.0061  | 0.65 |



| Dataset    | Gene     | Probe set    | Odds Ratio | Lower 95% CI | Upper 95% CI | P-value | AUC  |
|------------|----------|--------------|------------|--------------|--------------|---------|------|
| 3:GSE16879 | SEL1L3   | 212314_at    | 1.27       | 0.33         | 4.97         | 0.7295  | 0.51 |
| 3:GSE16879 | SEL1L3   | 235353_at    | 0.58       | 0.29         | 1.18         | 0.1350  | 0.58 |
| 1:GSE22207 | SH3PXD2A |              | 0.29       | 0.13         | 0.65         | 0.0029  | 0.93 |
| 2:GSE11799 | SH3PXD2A |              | 1.96       | 1.06         | 3.63         | 0.0316  | 0.63 |
| 3:GSE16879 | SH3PXD2A | 207661_s_at  | 0.99       | 0.68         | 1.44         | 0.9515  | 0.50 |
| 3:GSE16879 | SH3PXD2A | 213252_at    | 0.95       | 0.52         | 1.73         | 0.8596  | 0.52 |
| 3:GSE16879 | SH3PXD2A | 224817_at    | 0.19       | 0.06         | 0.62         | 0.0059  | 0.63 |
| 1:GSE22207 | SMARCD1  |              | 0.07       | 0.01         | 0.59         | 0.0147  | 0.81 |
| 2:GSE11799 | SMARCD1  |              | 1.03       | 0.39         | 2.73         | 0.9504  | 0.52 |
| 3:GSE16879 | SMARCD1  | 203183_s_at  | 0.69       | 0.35         | 1.33         | 0.2653  | 0.56 |
| 3:GSE16879 | SMARCD1  | 209518_at    | 0.76       | 0.36         | 1.59         | 0.4683  | 0.52 |
| 1:GSE22207 | SNPH     |              | 0.24       | 0.07         | 0.77         | 0.0170  | 0.83 |
| 2:GSE11799 | SNPH     |              | 0.45       | 0.30         | 0.68         | 0.0001  | 0.72 |
| 3:GSE16879 | SNPH     | 205104_at    | 0.43       | 0.28         | 0.65         | <.0001  | 0.76 |
| 1:GSE22207 | SNRNP48  |              | 7.23       | 1.42         | 36.87        | 0.0174  | 0.75 |
| 2:GSE11799 | SNRNP48  |              | 1.78       | 0.89         | 3.52         | 0.1007  | 0.62 |
| 3:GSE16879 | SNRNP48  | 1553274_a_at | 2.19       | 0.78         | 6.13         | 0.1363  | 0.58 |
| 3:GSE16879 | SNRNP48  | 226263_at    | 4.64       | 1.75         | 12.35        | 0.0021  | 0.70 |
| 1:GSE22207 | SOGA2    |              | 0.08       | 0.01         | 0.58         | 0.0121  | 0.90 |
| 1:GSE22207 | SPAG4    |              | 0.19       | 0.05         | 0.66         | 0.0090  | 0.88 |
| 2:GSE11799 | SPAG4    |              | 0.50       | 0.33         | 0.76         | 0.0012  | 0.69 |
| 3:GSE16879 | SPAG4    | 219888_at    | 0.74       | 0.57         | 0.97         | 0.0274  | 0.65 |
| 1:GSE22207 | SPNS2    |              | 0.26       | 0.09         | 0.76         | 0.0137  | 0.77 |
| 2:GSE11799 | SPNS2    |              | 0.42       | 0.26         | 0.69         | 0.0005  | 0.70 |
| 3:GSE16879 | SPNS2    | 225671_at    | 0.73       | 0.44         | 1.21         | 0.2248  | 0.55 |
| 1:GSE22207 | SSH1     |              | 0.20       | 0.05         | 0.75         | 0.0169  | 0.83 |
| 2:GSE11799 | SSH1     |              | 1.16       | 0.74         | 1.83         | 0.5173  | 0.52 |
| 3:GSE16879 | SSH1     | 1554274_a_at | 0.96       | 0.66         | 1.39         | 0.8096  | 0.51 |
| 3:GSE16879 | SSH1     | 1555624_a_at | 1.16       | 0.85         | 1.59         | 0.3431  | 0.55 |
| 3:GSE16879 | SSH1     | 221752_at    | 0.32       | 0.14         | 0.73         | 0.0064  | 0.65 |
| 3:GSE16879 | SSH1     | 221753_at    | 0.46       | 0.17         | 1.24         | 0.1259  | 0.59 |
| 1:GSE22207 | TACC1    |              | 0.11       | 0.02         | 0.70         | 0.0186  | 0.75 |
| 2:GSE11799 | TACC1    |              | 1.40       | 0.85         | 2.31         | 0.1913  | 0.57 |
| 3:GSE16879 | TACC1    | 1554690_a_at | 0.47       | 0.26         | 0.86         | 0.0133  | 0.63 |
| 3:GSE16879 | TACC1    | 200911_s_at  | 0.22       | 0.08         | 0.56         | 0.0015  | 0.68 |
| 3:GSE16879 | TACC1    | 217437_s_at  | 0.34       | 0.16         | 0.69         | 0.0032  | 0.67 |
| 3:GSE16879 | TACC1    | 242290_at    | 0.94       | 0.59         | 1.49         | 0.7793  | 0.52 |
| 1:GSE22207 | TCF4     |              | 0.17       | 0.04         | 0.64         | 0.0090  | 0.85 |
| 2:GSE11799 | TCF4     |              | 0.72       | 0.46         | 1.14         | 0.1571  | 0.59 |
| 3:GSE16879 | TCF4     | 203753_at    | 0.64       | 0.43         | 0.96         | 0.0293  | 0.62 |

| Dataset    | Gene     | Probe set   | Odds Ratio | Lower 95% CI | Upper 95% CI | P-value | AUC  |
|------------|----------|-------------|------------|--------------|--------------|---------|------|
| 3:GSE16879 | TCF4     | 212382_at   | 0.72       | 0.50         | 1.05         | 0.0864  | 0.59 |
| 3:GSE16879 | TCF4     | 212385_at   | 0.72       | 0.53         | 0.96         | 0.0269  | 0.64 |
| 3:GSE16879 | TCF4     | 212386_at   | 0.56       | 0.36         | 0.87         | 0.0091  | 0.66 |
| 3:GSE16879 | TCF4     | 212387_at   | 0.55       | 0.37         | 0.83         | 0.0047  | 0.66 |
| 3:GSE16879 | TCF4     | 213891_s_at | 0.64       | 0.45         | 0.92         | 0.0172  | 0.65 |
| 3:GSE16879 | TCF4     | 222146_s_at | 0.57       | 0.37         | 0.86         | 0.0075  | 0.68 |
| 3:GSE16879 | TCF4     | 228837_at   | 0.70       | 0.51         | 0.96         | 0.0251  | 0.65 |
| 1:GSE22207 | THBD     |             | 0.15       | 0.03         | 0.61         | 0.0086  | 0.81 |
| 2:GSE11799 | THBD     |             | 0.59       | 0.40         | 0.88         | 0.0092  | 0.64 |
| 3:GSE16879 | THBD     | 203887_s_at | 0.65       | 0.47         | 0.89         | 0.0079  | 0.67 |
| 3:GSE16879 | THBD     | 203888_at   | 0.69       | 0.51         | 0.92         | 0.0122  | 0.65 |
| 3:GSE16879 | THBD     | 237252_at   | 0.80       | 0.63         | 1.02         | 0.0686  | 0.60 |
| 1:GSE22207 | TLR1     |             | 0.25       | 0.08         | 0.74         | 0.0121  | 0.83 |
| 2:GSE11799 | TLR1     |             | 0.84       | 0.59         | 1.19         | 0.3252  | 0.56 |
| 3:GSE16879 | TLR1     | 210176_at   | 0.93       | 0.66         | 1.32         | 0.6959  | 0.54 |
| 1:GSE22207 | TMEM156  |             | 0.31       | 0.13         | 0.78         | 0.0125  | 0.79 |
| 2:GSE11799 | TMEM156  |             | 0.55       | 0.34         | 0.90         | 0.0165  | 0.63 |
| 3:GSE16879 | TMEM156  | 220169_at   | 0.75       | 0.54         | 1.02         | 0.0688  | 0.59 |
| 3:GSE16879 | TMEM156  | 241844_x_at | 0.71       | 0.52         | 0.96         | 0.0243  | 0.65 |
| 1:GSE22207 | TMEM159  |             | 0.23       | 0.07         | 0.75         | 0.0145  | 0.76 |
| 2:GSE11799 | TMEM159  |             | 0.40       | 0.14         | 1.15         | 0.0885  | 0.57 |
| 3:GSE16879 | TMEM159  | 213272_s_at | 0.16       | 0.07         | 0.39         | <.0001  | 0.74 |
| 1:GSE22207 | TMEM184B |             | 0.04       | 0.00         | 0.37         | 0.0046  | 0.88 |
| 2:GSE11799 | TMEM184B |             | 0.31       | 0.12         | 0.80         | 0.0157  | 0.63 |
| 3:GSE16879 | TMEM184B | 202027_at   | 0.41       | 0.13         | 1.25         | 0.1163  | 0.59 |
| 1:GSE22207 | TRIOBP   |             | 0.07       | 0.01         | 0.61         | 0.0159  | 0.78 |
| 2:GSE11799 | TRIOBP   |             | 1.22       | 0.63         | 2.37         | 0.5639  | 0.54 |
| 3:GSE16879 | TRIOBP   | 1552332_at  | 0.52       | 0.33         | 0.81         | 0.0040  | 0.67 |
| 3:GSE16879 | TRIOBP   | 1552334_at  | 0.23       | 0.09         | 0.59         | 0.0021  | 0.68 |
| 3:GSE16879 | TRIOBP   | 202795_x_at | 0.12       | 0.04         | 0.37         | 0.0002  | 0.70 |
| 3:GSE16879 | TRIOBP   | 210276_s_at | 0.06       | 0.02         | 0.23         | <.0001  | 0.76 |
| 3:GSE16879 | TRIOBP   | 216210_x_at | 0.14       | 0.05         | 0.40         | 0.0003  | 0.70 |
| 3:GSE16879 | TRIOBP   | 243690_at   | 0.49       | 0.25         | 0.98         | 0.0427  | 0.61 |
| 1:GSE22207 | TUT1     |             | 6.89       | 1.58         | 30.09        | 0.0103  | 0.81 |
| 2:GSE11799 | TUT1     |             | 2.68       | 0.91         | 7.90         | 0.0732  | 0.58 |
| 3:GSE16879 | TUT1     | 218965_s_at | 1.31       | 0.93         | 1.86         | 0.1190  | 0.54 |
| 1:GSE22207 | TYW3     |             | 0.16       | 0.03         | 0.70         | 0.0156  | 0.83 |
| 2:GSE11799 | TYW3     |             | 0.74       | 0.24         | 2.27         | 0.5935  | 0.53 |
| 3:GSE16879 | TYW3     | 227141_at   | 0.08       | 0.02         | 0.27         | <.0001  | 0.73 |
| 2:GSE11799 | UBALD2   |             | 4.03       | 1.32         | 12.25        | 0.0142  | 0.65 |

| Dataset    | Gene     | Probe set   | Odds Ratio | Lower 95% CI | Upper 95% CI | P-value | AUC  |
|------------|----------|-------------|------------|--------------|--------------|---------|------|
| 3:GSE16879 | UBALD2   | 224783_at   | 4.77       | 1.96         | 11.60        | 0.0006  | 0.70 |
| 3:GSE16879 | UBALD2   | 224785_at   | 1.26       | 0.69         | 2.30         | 0.4544  | 0.53 |
| 1:GSE22207 | UBE2J1   |             | 0.00       | 0.00         | 0.31         | 0.0123  | 0.90 |
| 2:GSE11799 | UBE2J1   |             | 0.31       | 0.12         | 0.77         | 0.0119  | 0.66 |
| 3:GSE16879 | UBE2J1   | 217823_s_at | 0.27       | 0.10         | 0.74         | 0.0115  | 0.64 |
| 3:GSE16879 | UBE2J1   | 217824_at   | 0.57       | 0.22         | 1.51         | 0.2619  | 0.56 |
| 3:GSE16879 | UBE2J1   | 217825_s_at | 0.18       | 0.05         | 0.65         | 0.0095  | 0.63 |
| 3:GSE16879 | UBE2J1   | 217826_s_at | 0.22       | 0.07         | 0.70         | 0.0105  | 0.66 |
| 3:GSE16879 | UBE2J1   | 222435_s_at | 0.14       | 0.05         | 0.40         | 0.0003  | 0.70 |
| 1:GSE22207 | USO1     |             | 0.07       | 0.01         | 0.53         | 0.0099  | 0.85 |
| 2:GSE11799 | USO1     |             | 1.14       | 0.65         | 2.00         | 0.6494  | 0.52 |
| 3:GSE16879 | USO1     | 201831_s_at | 0.31       | 0.08         | 1.22         | 0.0928  | 0.60 |
| 3:GSE16879 | USO1     | 201832_s_at | 0.22       | 0.06         | 0.75         | 0.0153  | 0.63 |
| 2:GSE11799 | USP17L9P |             | 1.00       | .            | .            | .       | 0.51 |
| 1:GSE22207 | USP36    |             | 11.45      | 1.75         | 75.15        | 0.0111  | 0.82 |
| 2:GSE11799 | USP36    |             | 2.25       | 0.85         | 5.94         | 0.1005  | 0.58 |
| 3:GSE16879 | USP36    | 1554836_at  | 0.79       | 0.61         | 1.02         | 0.0740  | 0.57 |
| 3:GSE16879 | USP36    | 220370_s_at | 0.63       | 0.35         | 1.13         | 0.1217  | 0.57 |
| 3:GSE16879 | USP36    | 224978_s_at | 0.21       | 0.09         | 0.50         | 0.0004  | 0.71 |
| 3:GSE16879 | USP36    | 224979_s_at | 0.56       | 0.38         | 0.84         | 0.0054  | 0.63 |
| 3:GSE16879 | USP36    | 227093_at   | 0.37       | 0.12         | 1.14         | 0.0838  | 0.59 |
| 1:GSE22207 | VDR      |             | 7.87       | 1.70         | 36.54        | 0.0084  | 0.81 |
| 2:GSE11799 | VDR      |             | 4.76       | 2.33         | 9.71         | <.0001  | 0.75 |
| 3:GSE16879 | VDR      | 204253_s_at | 2.66       | 1.19         | 5.93         | 0.0170  | 0.63 |
| 3:GSE16879 | VDR      | 204254_s_at | 7.42       | 3.13         | 17.61        | <.0001  | 0.76 |
| 3:GSE16879 | VDR      | 204255_s_at | 3.56       | 1.62         | 7.85         | 0.0016  | 0.70 |
| 1:GSE22207 | VIM      |             | 0.20       | 0.06         | 0.64         | 0.0065  | 0.85 |
| 2:GSE11799 | VIM      |             | 0.49       | 0.25         | 0.99         | 0.0466  | 0.64 |
| 3:GSE16879 | VIM      | 201426_s_at | 0.73       | 0.54         | 0.99         | 0.0426  | 0.61 |
| 1:GSE22207 | VPS4B    |             | 5.83       | 1.43         | 23.73        | 0.0138  | 0.80 |
| 2:GSE11799 | VPS4B    |             | 2.81       | 1.30         | 6.08         | 0.0088  | 0.65 |
| 3:GSE16879 | VPS4B    | 218171_at   | 2.15       | 0.64         | 7.23         | 0.2158  | 0.59 |
| 1:GSE22207 | XBP1     |             | 0.17       | 0.05         | 0.62         | 0.0067  | 0.83 |
| 2:GSE11799 | XBP1     |             | 0.21       | 0.10         | 0.43         | <.0001  | 0.75 |
| 1:GSE22207 | ZNF460   |             | 0.04       | 0.00         | 0.49         | 0.0127  | 0.81 |
| 2:GSE11799 | ZNF460   |             | 0.92       | 0.63         | 1.34         | 0.6667  | 0.50 |
| 3:GSE16879 | ZNF460   | 216279_at   | 0.65       | 0.42         | 1.02         | 0.0627  | 0.59 |
| 3:GSE16879 | ZNF460   | 233175_at   | 0.92       | 0.67         | 1.26         | 0.5977  | 0.54 |
