# Supplementary material for: Mucosal expression of PI3, ANXA1, and VDR discriminates Crohn’s disease from ulcerative colitis
Source: PubMed Central journal article supplement (PMC10611705; doi:10.1038/s41598-023-45569-3), 2023-10-27
Supplement: 41598_2023_45569_MOESM3_ESM.pdf [file 41598_2023_45569_MOESM3_ESM.pdf]

| Category               | ID         | Name                                                     | p-value  | q-value<br>Bonferroni | q-value<br>FDR B&H | q-value<br>FDR B&Y | Hit Count<br>in Query<br>List | Hit Count<br>in Genome | Hit in Query List     |
|------------------------|------------|----------------------------------------------------------|----------|-----------------------|--------------------|--------------------|-------------------------------|------------------------|-----------------------|
| GO: Molecular Function | GO:0038186 | lithocholic acid receptor activity                       | 4.02E-04 | 4.34E-02              | 1.63E-02           | 8.56E-02           | 1                             | 1                      | VDR                   |
| GO: Molecular Function | GO:1902098 | calcitriol binding                                       | 4.02E-04 | 4.34E-02              | 1.63E-02           | 8.56E-02           | 1                             | 1                      | VDR                   |
| GO: Molecular Function | GO:0036121 | double-stranded DNA helicase activity                    | 1.21E-03 | 1.30E-01              | 1.63E-02           | 8.56E-02           | 1                             | 3                      | ANXA1                 |
| GO: Molecular Function | GO:1902271 | D3 vitamins binding                                      | 1.21E-03 | 1.30E-01              | 1.63E-02           | 8.56E-02           | 1                             | 3                      | VDR                   |
| GO: Molecular Function | GO:0004471 | malate dehydrogenase (decarboxylating) (NAD+) activity   | 1.21E-03 | 1.30E-01              | 1.63E-02           | 8.56E-02           | 1                             | 3                      | ME1                   |
| GO: Molecular Function | GO:0004473 | malate dehydrogenase (decarboxylating) (NADP+) activity  | 1.21E-03 | 1.30E-01              | 1.63E-02           | 8.56E-02           | 1                             | 3                      | ME1                   |
| GO: Molecular Function | GO:0038181 | bile acid receptor activity                              | 1.21E-03 | 1.30E-01              | 1.63E-02           | 8.56E-02           | 1                             | 3                      | VDR                   |
| GO: Molecular Function | GO:0070644 | vitamin D response element binding                       | 1.21E-03 | 1.30E-01              | 1.63E-02           | 8.56E-02           | 1                             | 3                      | VDR                   |
| GO: Molecular Function | GO:0004470 | malic enzyme activity                                    | 1.61E-03 | 1.74E-01              | 1.74E-02           | 9.13E-02           | 1                             | 4                      | ME1                   |
| GO: Molecular Function | GO:0008948 | oxaloacetate decarboxylase activity                      | 1.61E-03 | 1.74E-01              | 1.74E-02           | 9.13E-02           | 1                             | 4                      | ME1                   |
| GO: Molecular Function | GO:1902121 | lithocholic acid binding                                 | 2.01E-03 | 2.17E-01              | 1.81E-02           | 9.51E-02           | 1                             | 5                      | VDR                   |
| GO: Molecular Function | GO:0019834 | phospholipase A2 inhibitor activity                      | 2.01E-03 | 2.17E-01              | 1.81E-02           | 9.51E-02           | 1                             | 5                      | ANXA1                 |
| GO: Molecular Function | GO:0005127 | ciliary neurotrophic factor receptor binding             | 2.81E-03 | 3.03E-01              | 2.33E-02           | 1.23E-01           | 1                             | 7                      | CLCF1                 |
| GO: Molecular Function | GO:0016615 | malate dehydrogenase activity                            | 3.21E-03 | 3.47E-01              | 2.48E-02           | 1.30E-01           | 1                             | 8                      | ME1                   |
| GO: Molecular Function | GO:0061134 | peptidase regulator activity                             | 4.22E-03 | 4.55E-01              | 2.89E-02           | 1.52E-01           | 2                             | 251                    | PI3,PRSS22            |
| GO: Molecular Function | GO:1990814 | DNA/DNA annealing activity                               | 4.41E-03 | 4.77E-01              | 2.89E-02           | 1.52E-01           | 1                             | 11                     | ANXA1                 |
| GO: Molecular Function | GO:0032052 | bile acid binding                                        | 4.81E-03 | 5.20E-01              | 2.89E-02           | 1.52E-01           | 1                             | 12                     | VDR                   |
| GO: Molecular Function | GO:0005499 | vitamin D binding                                        | 4.81E-03 | 5.20E-01              | 2.89E-02           | 1.52E-01           | 1                             | 12                     | VDR                   |
| GO: Molecular Function | GO:0004859 | phospholipase inhibitor activity                         | 5.21E-03 | 5.63E-01              | 2.96E-02           | 1.56E-01           | 1                             | 13                     | ANXA1                 |
| GO: Molecular Function | GO:0140666 | annealing activity                                       | 5.61E-03 | 6.06E-01              | 3.03E-02           | 1.60E-01           | 1                             | 14                     | ANXA1                 |
| GO: Molecular Function | GO:0055102 | lipase inhibitor activity                                | 7.21E-03 | 7.79E-01              | 3.71E-02           | 1.95E-01           | 1                             | 18                     | ANXA1                 |
| GO: Molecular Function | GO:0098641 | cadherin binding involved in cell-cell adhesion          | 7.61E-03 | 8.22E-01              | 3.74E-02           | 1.97E-01           | 1                             | 19                     | ANXA1                 |
| GO: Molecular Function | GO:0046965 | nuclear retinoid X receptor binding                      | 9.21E-03 | 9.94E-01              | 4.32E-02           | 2.28E-01           | 1                             | 23                     | VDR                   |
| GO: Biological Process | GO:0018149 | peptide cross-linking                                    | 8.69E-05 | 7.24E-02              | 3.06E-02           | 2.24E-01           | 2                             | 37                     | PI3,ANXA1             |
| GO: Biological Process | GO:0002828 | regulation of type 2 immune response                     | 9.17E-05 | 7.64E-02              | 3.06E-02           | 2.24E-01           | 2                             | 38                     | CLCF1,ANXA1           |
| GO: Biological Process | GO:0002285 | lymphocyte activation involved in immune response        | 1.10E-04 | 9.19E-02              | 3.06E-02           | 2.24E-01           | 3                             | 264                    | CD180,CLCF1,ANXA1     |
| GO: Biological Process | GO:0042092 | type 2 immune response                                   | 1.79E-04 | 1.49E-01              | 3.69E-02           | 2.69E-01           | 2                             | 53                     | CLCF1,ANXA1           |
| GO: Biological Process | GO:0046883 | regulation of hormone secretion                          | 2.99E-04 | 2.49E-01              | 3.69E-02           | 2.69E-01           | 3                             | 370                    | CLCF1,ANXA1,VDR       |
| GO: Biological Process | GO:0002366 | leukocyte activation involved in immune response         | 3.16E-04 | 2.63E-01              | 3.69E-02           | 2.69E-01           | 3                             | 377                    | CD180,CLCF1,ANXA1     |
| GO: Biological Process | GO:0002263 | cell activation involved in immune response              | 3.26E-04 | 2.71E-01              | 3.69E-02           | 2.69E-01           | 3                             | 381                    | CD180,CLCF1,ANXA1     |
| GO: Biological Process | GO:0046651 | lymphocyte proliferation                                 | 4.31E-04 | 3.59E-01              | 3.69E-02           | 2.69E-01           | 3                             | 419                    | CD180,CLCF1,ANXA1     |
| GO: Biological Process | GO:0032943 | mononuclear cell proliferation                           | 4.52E-04 | 3.77E-01              | 3.69E-02           | 2.69E-01           | 3                             | 426                    | CD180,CLCF1,ANXA1     |
| GO: Biological Process | GO:0046879 | hormone secretion                                        | 4.90E-04 | 4.08E-01              | 3.69E-02           | 2.69E-01           | 3                             | 438                    | CLCF1,ANXA1,VDR       |
| GO: Biological Process | GO:0009914 | hormone transport                                        | 5.48E-04 | 4.57E-01              | 3.69E-02           | 2.69E-01           | 3                             | 455                    | CLCF1,ANXA1,VDR       |
| GO: Biological Process | GO:0070661 | leukocyte proliferation                                  | 5.91E-04 | 4.93E-01              | 3.69E-02           | 2.69E-01           | 3                             | 467                    | CD180,CLCF1,ANXA1     |
| GO: Biological Process | GO:0002312 | B cell activation involved in immune response            | 6.38E-04 | 5.31E-01              | 3.69E-02           | 2.69E-01           | 2                             | 100                    | CD180,CLCF1           |
| GO: Biological Process | GO:0051050 | positive regulation of transport                         | 6.58E-04 | 5.48E-01              | 3.69E-02           | 2.69E-01           | 4                             | 1200                   | MTCL1,CLCF1,ANXA1,VDR |
| GO: Biological Process | GO:1903036 | positive regulation of response to wounding              | 6.64E-04 | 5.53E-01              | 3.69E-02           | 2.69E-01           | 2                             | 102                    | CLCF1,ANXA1           |
| GO: Biological Process | GO:0042100 | B cell proliferation                                     | 1.04E-03 | 8.68E-01              | 4.61E-02           | 3.37E-01           | 2                             | 128                    | CD180,CLCF1           |
| GO: Biological Process | GO:0010980 | positive regulation of vitamin D 24-hydroxylase activity | 1.16E-03 | 9.68E-01              | 4.61E-02           | 3.37E-01           | 1                             | 3                      | VDR                   |
| GO: Biological Process | GO:0010979 | regulation of vitamin D 24-hydroxylase activity          | 1.16E-03 | 9.68E-01              | 4.61E-02           | 3.37E-01           | 1                             | 3                      | VDR                   |
| GO: Biological Process | GO:0032101 | regulation of response to external stimulus              | 1.17E-03 | 9.73E-01              | 4.61E-02           | 3.37E-01           | 4                             | 1396                   | CD180,CLCF1,ANXA1,VDR |
| GO: Biological Process | GO:1900138 | negative regulation of phospholipase A2 activity         | 1.55E-03 | 1.00E+00              | 4.61E-02           | 3.37E-01           | 1                             | 4                      | ANXA1                 |
| GO: Biological Process | GO:1900155 | negative regulation of bone trabecula formation          | 1.55E-03 | 1.00E+00              | 4.61E-02           | 3.37E-01           | 1                             | 4                      | VDR                   |

|                        |            |                                                                               |          |          |          |          |   |     |                   |
|------------------------|------------|-------------------------------------------------------------------------------|----------|----------|----------|----------|---|-----|-------------------|
| GO: Biological Process | GO:1900154 | regulation of bone trabecula formation                                        | 1.55E-03 | 1.00E+00 | 4.61E-02 | 3.37E-01 | 1 | 4   | VDR               |
| GO: Biological Process | GO:0048295 | positive regulation of isotype switching to IgE isotypes                      | 1.55E-03 | 1.00E+00 | 4.61E-02 | 3.37E-01 | 1 | 4   | CLCF1             |
| GO: Biological Process | GO:0051466 | positive regulation of corticotropin-releasing hormone secretion              | 1.55E-03 | 1.00E+00 | 4.61E-02 | 3.37E-01 | 1 | 4   | CLCF1             |
| GO: Biological Process | GO:2000830 | positive regulation of parathyroid hormone secretion                          | 1.55E-03 | 1.00E+00 | 4.61E-02 | 3.37E-01 | 1 | 4   | VDR               |
| GO: Biological Process | GO:0014839 | myoblast migration involved in skeletal muscle regeneration                   | 1.55E-03 | 1.00E+00 | 4.61E-02 | 3.37E-01 | 1 | 4   | ANXA1             |
| GO: Biological Process | GO:0060057 | apoptotic process involved in mammary gland involution                        | 1.55E-03 | 1.00E+00 | 4.61E-02 | 3.37E-01 | 1 | 4   | VDR               |
| GO: Biological Process | GO:0060058 | positive regulation of apoptotic process involved in mammary gland involution | 1.55E-03 | 1.00E+00 | 4.61E-02 | 3.37E-01 | 1 | 4   | VDR               |
| GO: Biological Process | GO:0023061 | signal release                                                                | 1.80E-03 | 1.00E+00 | 4.62E-02 | 3.37E-01 | 3 | 685 | CLCF1,ANXA1,VDR   |
| GO: Biological Process | GO:2000828 | regulation of parathyroid hormone secretion                                   | 1.94E-03 | 1.00E+00 | 4.62E-02 | 3.37E-01 | 1 | 5   | VDR               |
| GO: Biological Process | GO:0043397 | regulation of corticotropin-releasing hormone secretion                       | 1.94E-03 | 1.00E+00 | 4.62E-02 | 3.37E-01 | 1 | 5   | CLCF1             |
| GO: Biological Process | GO:0043396 | corticotropin-releasing hormone secretion                                     | 1.94E-03 | 1.00E+00 | 4.62E-02 | 3.37E-01 | 1 | 5   | CLCF1             |
| GO: Biological Process | GO:0045629 | negative regulation of T-helper 2 cell differentiation                        | 1.94E-03 | 1.00E+00 | 4.62E-02 | 3.37E-01 | 1 | 5   | ANXA1             |
| GO: Biological Process | GO:0010817 | regulation of hormone levels                                                  | 2.11E-03 | 1.00E+00 | 4.62E-02 | 3.37E-01 | 3 | 724 | CLCF1,ANXA1,VDR   |
| GO: Biological Process | GO:0070564 | positive regulation of vitamin D receptor signaling pathway                   | 2.32E-03 | 1.00E+00 | 4.62E-02 | 3.37E-01 | 1 | 6   | VDR               |
| GO: Biological Process | GO:0002322 | B cell proliferation involved in immune response                              | 2.32E-03 | 1.00E+00 | 4.62E-02 | 3.37E-01 | 1 | 6   | CD180             |
| GO: Biological Process | GO:0033031 | positive regulation of neutrophil apoptotic process                           | 2.32E-03 | 1.00E+00 | 4.62E-02 | 3.37E-01 | 1 | 6   | ANXA1             |
| GO: Biological Process | GO:0030216 | keratinocyte differentiation                                                  | 2.52E-03 | 1.00E+00 | 4.62E-02 | 3.37E-01 | 2 | 200 | ANXA1,VDR         |
| GO: Biological Process | GO:0050671 | positive regulation of lymphocyte proliferation                               | 2.57E-03 | 1.00E+00 | 4.62E-02 | 3.37E-01 | 2 | 202 | CLCF1,ANXA1       |
| GO: Biological Process | GO:0032946 | positive regulation of mononuclear cell proliferation                         | 2.64E-03 | 1.00E+00 | 4.62E-02 | 3.37E-01 | 2 | 205 | CLCF1,ANXA1       |
| GO: Biological Process | GO:0071396 | cellular response to lipid                                                    | 2.69E-03 | 1.00E+00 | 4.62E-02 | 3.37E-01 | 3 | 788 | CD180,ANXA1,VDR   |
| GO: Biological Process | GO:1902339 | positive regulation of apoptotic process involved in morphogenesis            | 2.71E-03 | 1.00E+00 | 4.62E-02 | 3.37E-01 | 1 | 7   | VDR               |
| GO: Biological Process | GO:0060558 | regulation of calcidiol 1-monooxygenase activity                              | 2.71E-03 | 1.00E+00 | 4.62E-02 | 3.37E-01 | 1 | 7   | VDR               |
| GO: Biological Process | GO:0048293 | regulation of isotype switching to IgE isotypes                               | 2.71E-03 | 1.00E+00 | 4.62E-02 | 3.37E-01 | 1 | 7   | CLCF1             |
| GO: Biological Process | GO:0048289 | isotype switching to IgE isotypes                                             | 2.71E-03 | 1.00E+00 | 4.62E-02 | 3.37E-01 | 1 | 7   | CLCF1             |
| GO: Biological Process | GO:0060745 | mammary gland branching involved in pregnancy                                 | 2.71E-03 | 1.00E+00 | 4.62E-02 | 3.37E-01 | 1 | 7   | VDR               |
| GO: Biological Process | GO:0097350 | neutrophil clearance                                                          | 2.71E-03 | 1.00E+00 | 4.62E-02 | 3.37E-01 | 1 | 7   | ANXA1             |
| GO: Biological Process | GO:0035898 | parathyroid hormone secretion                                                 | 2.71E-03 | 1.00E+00 | 4.62E-02 | 3.37E-01 | 1 | 7   | VDR               |
| GO: Biological Process | GO:0046887 | positive regulation of hormone secretion                                      | 2.72E-03 | 1.00E+00 | 4.62E-02 | 3.37E-01 | 2 | 208 | CLCF1,VDR         |
| GO: Biological Process | GO:1903530 | regulation of secretion by cell                                               | 2.94E-03 | 1.00E+00 | 4.82E-02 | 3.52E-01 | 3 | 813 | CLCF1,ANXA1,VDR   |
| GO: Biological Process | GO:1904747 | positive regulation of apoptotic process involved in development              | 3.10E-03 | 1.00E+00 | 4.82E-02 | 3.52E-01 | 1 | 8   | VDR               |
| GO: Biological Process | GO:0070459 | prolactin secretion                                                           | 3.10E-03 | 1.00E+00 | 4.82E-02 | 3.52E-01 | 1 | 8   | ANXA1             |
| GO: Biological Process | GO:0070665 | positive regulation of leukocyte proliferation                                | 3.12E-03 | 1.00E+00 | 4.82E-02 | 3.52E-01 | 2 | 223 | CLCF1,ANXA1       |
| GO: Biological Process | GO:0050778 | positive regulation of immune response                                        | 3.12E-03 | 1.00E+00 | 4.82E-02 | 3.52E-01 | 3 | 831 | CD180,CLCF1,ANXA1 |
| GO: Biological Process | GO:0002252 | immune effector process                                                       | 3.24E-03 | 1.00E+00 | 4.91E-02 | 3.59E-01 | 3 | 842 | CD180,CLCF1,ANXA1 |
| GO: Biological Process | GO:1903412 | response to bile acid                                                         | 3.48E-03 | 1.00E+00 | 4.92E-02 | 3.59E-01 | 1 | 9   | VDR               |
| GO: Biological Process | GO:0006108 | malate metabolic process                                                      | 3.48E-03 | 1.00E+00 | 4.92E-02 | 3.59E-01 | 1 | 9   | ME1               |
| GO: Biological Process | GO:0010519 | negative regulation of phospholipase activity                                 | 3.48E-03 | 1.00E+00 | 4.92E-02 | 3.59E-01 | 1 | 9   | ANXA1             |
| GO: Biological Process | GO:0045627 | positive regulation of T-helper 1 cell differentiation                        | 3.48E-03 | 1.00E+00 | 4.92E-02 | 3.59E-01 | 1 | 9   | ANXA1             |
| GO: Biological Process | GO:1903034 | regulation of response to wounding                                            | 3.57E-03 | 1.00E+00 | 4.95E-02 | 3.62E-01 | 2 | 239 | CLCF1,ANXA1       |
| GO: Cellular Component | GO:0001533 | cornified envelope                                                            | 2.88E-04 | 2.25E-02 | 1.99E-02 | 9.83E-02 | 2 | 68  | PI3,ANXA1         |
| GO: Cellular Component | GO:0016328 | lateral plasma membrane                                                       | 6.72E-04 | 5.25E-02 | 1.99E-02 | 9.83E-02 | 2 | 104 | MTCL1,ANXA1       |
| GO: Cellular Component | GO:0097059 | CNTFR-CLCF1 complex                                                           | 7.65E-04 | 5.97E-02 | 1.99E-02 | 9.83E-02 | 1 | 2   | CLCF1             |
| GO: Cellular Component | GO:0097058 | CRLF-CLCF1 complex                                                            | 1.15E-03 | 8.95E-02 | 2.09E-02 | 1.03E-01 | 1 | 3   | CLCF1             |
| GO: Cellular Component | GO:0031012 | extracellular matrix                                                          | 1.59E-03 | 1.24E-01 | 2.09E-02 | 1.03E-01 | 3 | 665 | CD180,PI3,ANXA1   |
| GO: Cellular Component | GO:0030312 | external encapsulating structure                                              | 1.60E-03 | 1.25E-01 | 2.09E-02 | 1.03E-01 | 3 | 667 | CD180,PI3,ANXA1   |
| GO: Cellular Component | GO:0042383 | sarcolemma                                                                    | 2.19E-03 | 1.71E-01 | 2.24E-02 | 1.11E-01 | 2 | 189 | ANXA1,VDR         |
| GO: Cellular Component | GO:0097427 | microtubule bundle                                                            | 2.29E-03 | 1.79E-01 | 2.24E-02 | 1.11E-01 | 1 | 6   | MTCL1             |

|                        |            |                                                         |          |          |          |          |   |    |       |
|------------------------|------------|---------------------------------------------------------|----------|----------|----------|----------|---|----|-------|
| GO: Cellular Component | GO:0001651 | dense fibrillar component                               | 2.68E-03 | 2.09E-01 | 2.32E-02 | 1.15E-01 | 1 | 7  | VDR   |
| GO: Cellular Component | GO:0042629 | mast cell granule                                       | 3.06E-03 | 2.38E-01 | 2.38E-02 | 1.18E-01 | 1 | 8  | ANXA1 |
| GO: Cellular Component | GO:0031232 | extrinsic component of external side of plasma membrane | 4.96E-03 | 3.87E-01 | 3.52E-02 | 1.74E-01 | 1 | 13 | ANXA1 |
